# Supplementary material for: De Novo Assembly of the Japanese Flounder (Paralichthys olivaceus) Spleen Transcriptome to Identify Putative Genes Involved in Immunity
Source: PLoS One. 2015 Feb 27;10(2):e0117642. doi: 10.1371/journal.pone.0117642 (PMC4344349; doi:10.1371/journal.pone.0117642)
Supplement: S6 Table — (XLS) [file pone.0117642.s010.xls]

## Sheet: Sheet1
Toll-like receptor signaling pathway
Unigene ID	KO	Gene name	Description
Locus_15118_Transcript_1/1_Confidence_1.000_Length_407	ko:K05398	TLR1	toll-like receptor 1
Locus_19602_Transcript_1/1_Confidence_1.000_Length_666	ko:K05398	TLR1	toll-like receptor 1
Locus_1924_Transcript_7/10_Confidence_0.525_Length_4193	ko:K10159	TLR2	toll-like receptor 2
Locus_9278_Transcript_1/1_Confidence_1.000_Length_443	ko:K05401	TLR3	toll-like receptor 3
Locus_68957_Transcript_1/1_Confidence_1.000_Length_239	ko:K05401	TLR3	toll-like receptor 3
Locus_1_Transcript_144362/226691_Confidence_1.000_Length_349	ko:K10168	TLR5	toll-like recepto 5
Locus_4268_Transcript_1/2_Confidence_0.667_Length_829	ko:K10168	TLR5	toll-like recepto 5
Locus_38599_Transcript_1/1_Confidence_1.000_Length_250	ko:K05404	TLR7	toll-like receptor 7
Locus_23544_Transcript_1/1_Confidence_1.000_Length_433	ko:K10170	TLR8	toll-like receptor 8
Locus_1_Transcript_186880/226691_Confidence_1.000_Length_473	ko:K01371	CTSK	cathepsin K
Locus_439_Transcript_1/1_Confidence_1.000_Length_733	ko:K10161	TLR9	toll-like receptor 9
Locus_7163_Transcript_1/1_Confidence_1.000_Length_525	ko:K10161	TLR9	toll-like receptor 9
Locus_1_Transcript_77447/226691_Confidence_1.000_Length_220	ko:K04392	RAC1	Ras-related C3 botulinum toxin substrate 1
Locus_1_Transcript_101460/226691_Confidence_1.000_Length_260	ko:K04392	RAC1	Ras-related C3 botulinum toxin substrate 1
Locus_1_Transcript_148977/226691_Confidence_1.000_Length_477	ko:K04392	RAC1	Ras-related C3 botulinum toxin substrate 1
Locus_47482_Transcript_1/1_Confidence_1.000_Length_217	ko:K04392	RAC1	Ras-related C3 botulinum toxin substrate 1
Locus_1_Transcript_108605/226691_Confidence_1.000_Length_3331	ko:K00922	PIK3C	phosphatidylinositol-4,5-bisphosphate 3-kinase
Locus_1_Transcript_180451/226691_Confidence_1.000_Length_222	ko:K00922	PIK3C	phosphatidylinositol-4,5-bisphosphate 3-kinase
Locus_1_Transcript_180455/226691_Confidence_1.000_Length_746	ko:K00922	PIK3C	phosphatidylinositol-4,5-bisphosphate 3-kinase
Locus_870_Transcript_28/30_Confidence_0.156_Length_3976	ko:K00922	PIK3C	phosphatidylinositol-4,5-bisphosphate 3-kinase
Locus_2292_Transcript_1/1_Confidence_1.000_Length_2358	ko:K00922	PIK3C	phosphatidylinositol-4,5-bisphosphate 3-kinase
Locus_15450_Transcript_1/1_Confidence_1.000_Length_2013	ko:K00922	PIK3C	phosphatidylinositol-4,5-bisphosphate 3-kinase
Locus_22959_Transcript_1/1_Confidence_1.000_Length_1042	ko:K00922	PIK3C	phosphatidylinositol-4,5-bisphosphate 3-kinase
Locus_24122_Transcript_1/1_Confidence_1.000_Length_447	ko:K00922	PIK3C	phosphatidylinositol-4,5-bisphosphate 3-kinase
Locus_24686_Transcript_1/1_Confidence_1.000_Length_946	ko:K00922	PIK3C	phosphatidylinositol-4,5-bisphosphate 3-kinase
Locus_1_Transcript_79309/226691_Confidence_1.000_Length_2114	ko:K02649	PIK3R	phosphoinositide-3-kinase, regulatory subunit
Locus_1_Transcript_152693/226691_Confidence_1.000_Length_1849	ko:K02649	PIK3R	phosphoinositide-3-kinase, regulatory subunit
Locus_1_Transcript_185122/226691_Confidence_1.000_Length_207	ko:K02649	PIK3R	phosphoinositide-3-kinase, regulatory subunit
Locus_1_Transcript_185125/226691_Confidence_1.000_Length_1489	ko:K02649	PIK3R	phosphoinositide-3-kinase, regulatory subunit
Locus_3365_Transcript_1/1_Confidence_1.000_Length_1227	ko:K02649	PIK3R	phosphoinositide-3-kinase, regulatory subunit
Locus_13115_Transcript_1/3_Confidence_0.750_Length_2735	ko:K02649	PIK3R	phosphoinositide-3-kinase, regulatory subunit
Locus_13115_Transcript_2/3_Confidence_0.750_Length_2781	ko:K02649	PIK3R	phosphoinositide-3-kinase, regulatory subunit
Locus_23231_Transcript_1/1_Confidence_1.000_Length_684	ko:K02649	PIK3R	phosphoinositide-3-kinase, regulatory subunit
Locus_1_Transcript_98116/226691_Confidence_1.000_Length_2081	ko:K04456	AKT	RAC serine/threonine-protein kinase
Locus_1_Transcript_112069/226691_Confidence_1.000_Length_1465	ko:K04456	AKT	RAC serine/threonine-protein kinase
Locus_1_Transcript_185435/226691_Confidence_1.000_Length_1387	ko:K04456	AKT	RAC serine/threonine-protein kinase
Locus_3839_Transcript_1/1_Confidence_1.000_Length_3580	ko:K04456	AKT	RAC serine/threonine-protein kinase
Locus_7041_Transcript_1/2_Confidence_0.750_Length_2547	ko:K04456	AKT	RAC serine/threonine-protein kinase [
Locus_8483_Transcript_10/12_Confidence_0.324_Length_3543	ko:K05402	TOLLIP	toll-interacting protein
Locus_844_Transcript_7/14_Confidence_0.043_Length_249	ko:K04729	MYD88	myeloid differentiation primary response protein MyD88
Locus_844_Transcript_13/14_Confidence_0.370_Length_1894	ko:K04729	MYD88	myeloid differentiation primary response protein MyD88
Locus_3441_Transcript_1/1_Confidence_1.000_Length_1178	ko:K04398	CASP8	caspase 8
Locus_1_Transcript_210263/226691_Confidence_1.000_Length_386	ko:K04733	IRAK4	interleukin-1 receptor-associated kinase 4
Locus_1_Transcript_210264/226691_Confidence_1.000_Length_475	ko:K04733	IRAK4	interleukin-1 receptor-associated kinase 4
Locus_1032_Transcript_5/6_Confidence_0.429_Length_2180	ko:K04730	IRAK1	interleukin-1 receptor-associated kinase 1
Locus_17260_Transcript_1/1_Confidence_1.000_Length_722	ko:K03175	TRAF6	TNF receptor-associated factor 6
Locus_1_Transcript_154334/226691_Confidence_1.000_Length_1473	ko:K04403	MAP3K7IP1, TAB1	TAK1-binding protein 1
Locus_3331_Transcript_1/1_Confidence_1.000_Length_2663	ko:K04404	MAP3K7IP2, TAB2	TAK1-binding protein 2
Locus_5052_Transcript_2/3_Confidence_0.667_Length_2785	ko:K04427	MAP3K7, TAK1	mitogen-activated protein kinase kinase kinase 7
Locus_6674_Transcript_1/2_Confidence_0.800_Length_2076	ko:K04427	MAP3K7, TAK1	mitogen-activated protein kinase kinase kinase 7
Locus_1_Transcript_157538/226691_Confidence_1.000_Length_225	ko:K07210	IKBKG, IKKG, NEMO	inhibitor of nuclear factor kappa-B kinase subunit gamma
Locus_1_Transcript_157542/226691_Confidence_1.000_Length_747	ko:K07210	IKBKG, IKKG, NEMO	inhibitor of nuclear factor kappa-B kinase subunit gamma
Locus_1_Transcript_157545/226691_Confidence_1.000_Length_649	ko:K07210	IKBKG, IKKG, NEMO	inhibitor of nuclear factor kappa-B kinase subunit gamma
Locus_1_Transcript_175032/226691_Confidence_1.000_Length_833	ko:K04467	IKBKA, IKKA, CHUK	inhibitor of nuclear factor kappa-B kinase subunit alpha
Locus_1_Transcript_175033/226691_Confidence_1.000_Length_728	ko:K04467	IKBKA, IKKA, CHUK	inhibitor of nuclear factor kappa-B kinase subunit alpha
Locus_1_Transcript_175042/226691_Confidence_1.000_Length_238	ko:K04467	IKBKA, IKKA, CHUK	inhibitor of nuclear factor kappa-B kinase subunit alpha
Locus_3336_Transcript_5/10_Confidence_0.593_Length_3435	ko:K04467	IKBKA, IKKA, CHUK	inhibitor of nuclear factor kappa-B kinase subunit alpha
Locus_12739_Transcript_2/5_Confidence_0.615_Length_4466	ko:K07209	IKBKB, IKKB	inhibitor of nuclear factor kappa-B kinase subunit beta
Locus_1_Transcript_140863/226691_Confidence_1.000_Length_1670	ko:K02580	NFKB1	nuclear factor NF-kappa-B p105 subunit
Locus_1_Transcript_178871/226691_Confidence_1.000_Length_498	ko:K04735	RELA	transcription factor p65
Locus_1_Transcript_116034/226691_Confidence_1.000_Length_340	ko:K04415	MAP3K8, COT	mitogen-activated protein kinase kinase kinase 8
Locus_1_Transcript_152397/226691_Confidence_1.000_Length_1491	ko:K04368	MAP2K1, MEK1	mitogen-activated protein kinase kinase 1
Locus_12839_Transcript_3/3_Confidence_0.667_Length_1798	ko:K04369	MAP2K2, MEK2	mitogen-activated protein kinase kinase 2
Locus_30488_Transcript_1/1_Confidence_1.000_Length_265	ko:K04369	MAP2K2, MEK2	mitogen-activated protein kinase kinase 2
Locus_1_Transcript_109593/226691_Confidence_1.000_Length_1050	ko:K04371	ERK1_2	extracellular signal-regulated kinase 1/2
Locus_5716_Transcript_1/1_Confidence_1.000_Length_1307	ko:K04371	ERK1_2	extracellular signal-regulated kinase 1/2
Locus_5025_Transcript_13/14_Confidence_0.705_Length_4072	ko:K04433	MAP2K6, MKK6	mitogen-activated protein kinase kinase 6
Locus_33278_Transcript_1/1_Confidence_1.000_Length_352	ko:K04433	MAP2K6, MKK6	mitogen-activated protein kinase kinase 6
Locus_1_Transcript_170548/226691_Confidence_1.000_Length_1535	ko:K04430	MAP2K4, MKK4	mitogen-activated protein kinase kinase 4
Locus_405_Transcript_1/2_Confidence_0.667_Length_2275	ko:K04430	MAP2K4, MKK4	mitogen-activated protein kinase kinase 4
Locus_3195_Transcript_1/1_Confidence_1.000_Length_682	ko:K04431	MAP2K7, MKK7	mitogen-activated protein kinase kinase 7
Locus_1_Transcript_122672/226691_Confidence_1.000_Length_254	ko:K04441	P38	p38 MAP kinase
Locus_1_Transcript_122678/226691_Confidence_1.000_Length_671	ko:K04441	P38	p38 MAP kinase
Locus_1_Transcript_170847/226691_Confidence_1.000_Length_694	ko:K04441	P38	p38 MAP kinase
Locus_1_Transcript_218964/226691_Confidence_1.000_Length_823	ko:K04441	P38	p38 MAP kinase
Locus_88_Transcript_1/3_Confidence_0.182_Length_1238	ko:K04441	P38	p38 MAP kinase
Locus_88_Transcript_3/3_Confidence_0.636_Length_3436	ko:K04441	P38	p38 MAP kinase
Locus_440_Transcript_6/6_Confidence_0.611_Length_1607	ko:K04441	P38	p38 MAP kinase
Locus_3163_Transcript_1/1_Confidence_1.000_Length_1662	ko:K04441	P38	p38 MAP kinase
Locus_206_Transcript_3/3_Confidence_0.750_Length_4420	ko:K04440	JNK	c-Jun N-terminal kinase
Locus_4401_Transcript_1/1_Confidence_1.000_Length_403	ko:K04440	JNK	c-Jun N-terminal kinase
Locus_4811_Transcript_1/1_Confidence_1.000_Length_832	ko:K04440	JNK	c-Jun N-terminal kinase
Locus_19329_Transcript_1/1_Confidence_1.000_Length_382	ko:K04440	JNK	c-Jun N-terminal kinase
Locus_53112_Transcript_1/1_Confidence_1.000_Length_331	ko:K04440	JNK	c-Jun N-terminal kinase
Locus_68804_Transcript_1/1_Confidence_1.000_Length_202	ko:K04440	JNK	c-Jun N-terminal kinase
Locus_1_Transcript_121768/226691_Confidence_1.000_Length_523	ko:K04448	JUN	transcription factor AP-1
Locus_1_Transcript_184841/226691_Confidence_1.000_Length_673	ko:K04448	JUN	transcription factor AP-1
Locus_1_Transcript_184842/226691_Confidence_1.000_Length_318	ko:K04448	JUN	transcription factor AP-1
Locus_1_Transcript_205615/226691_Confidence_1.000_Length_377	ko:K04379	FOS	proto-oncogene protein c-fos
Locus_6985_Transcript_1/1_Confidence_1.000_Length_534	ko:K04379	FOS	proto-oncogene protein c-fos
Locus_1_Transcript_113498/226691_Confidence_1.000_Length_438	ko:K03156	TNFA	tumor necrosis factor superfamily, member 2
Locus_168_Transcript_22/24_Confidence_0.189_Length_2348	ko:K04519	IL1B	interleukin 1 beta
Locus_15382_Transcript_1/2_Confidence_0.750_Length_921	ko:K05406	IL12A	interleukin 12A
Locus_23918_Transcript_1/1_Confidence_1.000_Length_1121	ko:K05425	IL12B	interleukin 12B
Locus_1_Transcript_162922/226691_Confidence_1.000_Length_323	ko:K05842	TRIF	toll-like receptor adapter molecule 1
Locus_16250_Transcript_1/1_Confidence_1.000_Length_983	ko:K05842	TRIF	toll-like receptor adapter molecule 1
Locus_1320_Transcript_6/6_Confidence_0.643_Length_4183	ko:K02861	RIPK1, RIP1	receptor-interacting serine/threonine-protein kinase 1
Locus_1_Transcript_200467/226691_Confidence_1.000_Length_510	ko:K09446	IRF5	interferon regulatory factor 5
Locus_1_Transcript_144083/226691_Confidence_1.000_Length_899	ko:K09447	IRF7	interferon regulatory factor 7
Locus_12152_Transcript_4/8_Confidence_0.471_Length_2484	ko:K07211	IKBKE, IKKE	inhibitor of nuclear factor kappa-B kinase subunit epsilon
Locus_1_Transcript_100968/226691_Confidence_1.000_Length_674	ko:K05410	TBK1	TANK-binding kinase 1
Locus_1_Transcript_117663/226691_Confidence_1.000_Length_493	ko:K03174	TRAF3	TNF receptor-associated factor 3
Locus_1_Transcript_147243/226691_Confidence_1.000_Length_224	ko:K05411	IRF3	interferon regulatory factor 3
Locus_1_Transcript_204450/226691_Confidence_1.000_Length_647	ko:K05130	IFNAR1	interferon receptor 1
Locus_1_Transcript_198766/226691_Confidence_1.000_Length_375	ko:K05131	IFNAR2	interferon receptor 2
Locus_1_Transcript_198767/226691_Confidence_1.000_Length_520	ko:K05131	IFNAR2	interferon receptor 2
Locus_1_Transcript_216230/226691_Confidence_1.000_Length_550	ko:K05131	IFNAR2	interferon receptor 2
Locus_1_Transcript_76345/226691_Confidence_1.000_Length_1430	ko:K11220	STAT1	signal transducer and activator of transcription 1
Locus_62164_Transcript_1/1_Confidence_1.000_Length_353	ko:K11220	STAT1	signal transducer and activator of transcription 1
Locus_139_Transcript_7/11_Confidence_0.422_Length_924	ko:K12671	CXCL10, IP10	C-X-C motif chemokine 10
